## 2016 ANNUAL JOURNAL SYMPOSIUM

### “Coagulation 2016: New Data and New Drugs—Perioperative Considerations”

The American Society of Anesthesiologists (ASA) and its journal, *ANESTHESIOLOGY*, announce the 25th annual Journal Symposium to be held at the ASA Annual Meeting in Chicago, Illinois. The 2016 Journal Symposium will feature the following presentations:

#### Moderators:

Jerrold H. Levy, M.D., F.A.H.A., F.C.C.M., Professor of Anesthesiology, Duke University School of Medicine, and Michael J. Avram, Ph.D., Professor of Anesthesiology, Northwestern University School of Medicine

#### Topics and Speakers:

1. Critical quality of clot structure: Alisa S. Wolberg, Ph.D., F.A.H.A., Associate Professor Pathology and Laboratory Medicine, University of North Carolina at Chapel Hill
2. Anticoagulation management for surgery and regional anesthesia: Marc Samama, M.D., Ph.D., F.C.C.P., Professor and Chair, Department of Anaesthesia and Intensive Care Medicine, Cochin and Hôtel-Dieu University Hospitals, Paris, France
3. Managing new anticoagulants: Purified and recombinant strategies for prevention and treatment of bleeding: Jerrold H. Levy, M.D., F.A.H.A., F.C.C.M., Professor of Anesthesiology, Associate Professor of Surgery, Duke University School of Medicine

#### Description:

In a perioperative setting, managing bleeding and coagulopathy are critical for clinicians. Perioperative bleeding is due to multiple causes including fibrinolysis, activation of inflammatory pathways, consumption of coagulation factors, dilutional changes, and other factors. Additionally, an increasingly frequent cause of bleeding is the perioperative use of anticoagulation and antiplatelet agents that until recently have no well-established reversal methods. New direct acting oral anticoagulants are frequently utilized for management of both venous thromboembolic prophylaxis and therapy, as well as stroke prevention in patients with atrial fibrillation. As a result, new data and therapeutic approaches have emerged for understanding critical aspects of clot formation for hemostasis, management of perioperative anticoagulation especially for regional anesthesia, and specific antidotes for the novel anticoagulants.

Three experts will introduce these topics for the first 90 minutes of the symposium, with 25-minute presentations and 5-minute discussions. The speakers will discuss three different considerations from the basic science of clot structure, to new data and guidelines about managing perioperative anticoagulation, and novel considerations for the use of recombinant and purified therapeutic approaches to reverse anticoagulation and treating bleeding and coagulopathy.

We invite abstracts on this topic from all related fields: basic science, translational, clinical and quality research. The top eight abstracts will be presented orally during the second half of the symposium. Authors of these selected abstracts will be invited to submit their work to *ANESTHESIOLOGY* for possible inclusion in an issue on this theme.

Authors are encouraged to submit manuscripts on this topic for consideration for publication in *ANESTHESIOLOGY* even if they are not presenting an abstract.

Deadline for submission is August 1, 2016.
